# Supplementary material for: Modular Nanotransporters Delivering Biologically Active Molecules to the Surface of Mitochondria
Source: Preprints.org preprint supplement (doi:10.20944/preprints202311.0337.v1), 2023-11-07
Supplement: Supplementary file 1 [file supplementary]

Supplementary Materials:

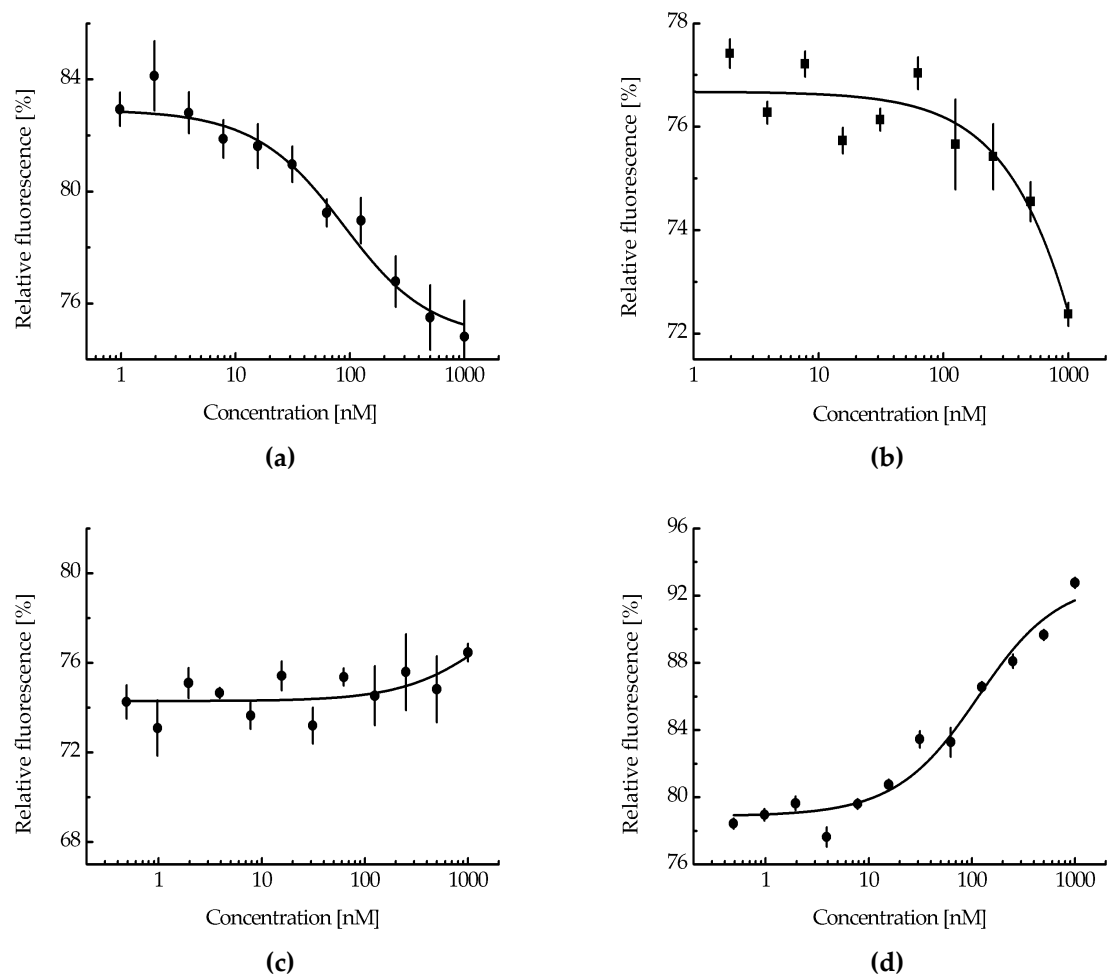

**Figure S1.** Thermophoretic curves for MNT<sub>0</sub> (a), Affibody (b), DT0x (c) and DT0x-HMP (d) and Keap1. Fluorescence before the start of thermophoresis was taken as 100%. Fluorescence values 20 seconds after the start of thermophoresis are shown.

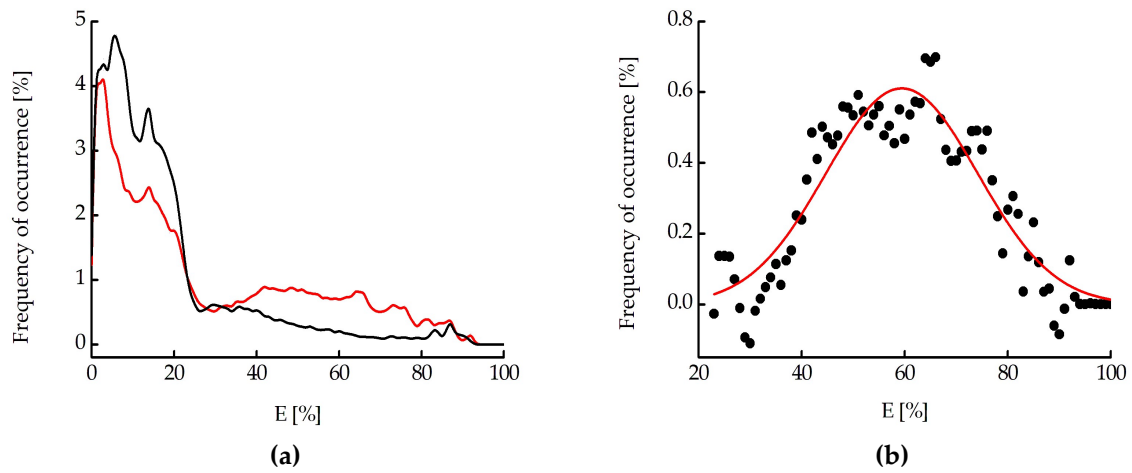

**Figure S2.** (a) Frequency of occurrence of FRET efficiency,  $E$ , of AML12 cells transiently transfected with Keap1-hrGFP that were incubated for 1 hour with 500 nM MNT1-AF568. The black curve shows the histogram for the control, in which MNT was not added to AML12 cells. (b) Difference in FRET efficiency histograms for AML12 cells supplemented with MNT1-AF568 and control. The red curve shows the interpolation of the experimental data from the Gaussian curve. All histograms were obtained by averaging data over 10-14 cells.
